# Supplementary material
Source: HighWire-hosted journal article supplement (doi:10.1101/rna.037044.112)
Supplement: Revised_Supplemental_Figs_3_6.pdf [file Revised_Supplemental_Figs_3_6.pdf]

A

| 5' ss | sequence            | HBS   | Maxent |
|-------|---------------------|-------|--------|
| D1    | <b>CuG/GUGAGUAc</b> | 17.50 | 10.10  |
| L1    | <b>CAc/GUGAGUcc</b> | 14.20 | 9.30   |
| L2    | <b>Ccc/GUGAGUcc</b> | 12.10 | 8.40   |
| L3    | <b>Cuc/GUAcGUcc</b> | 10.70 | 7.59   |

B

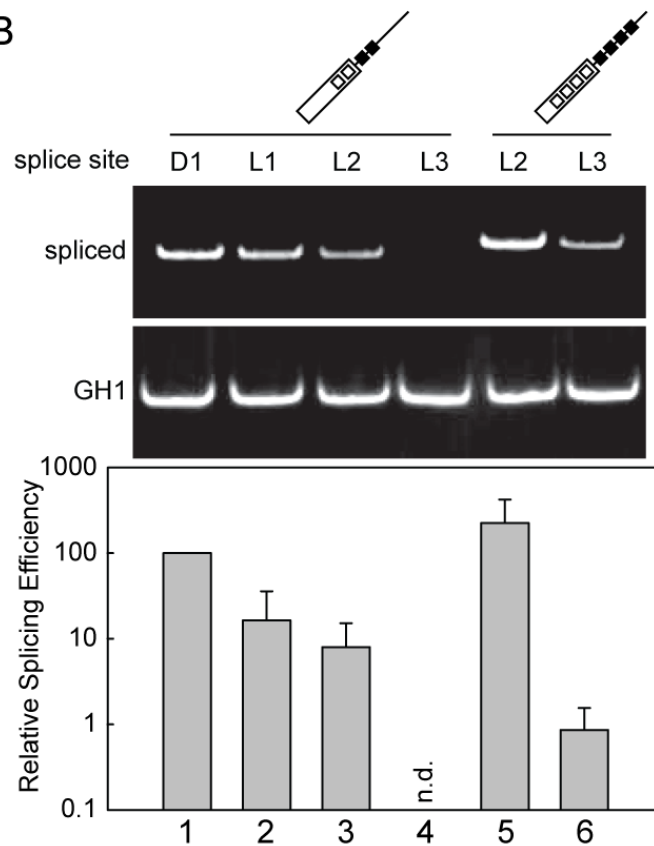

**Supplemental Figure 3: Multiple PDEs synergize in activating weak 5' splice sites.**

To analyze the functional interdependence of the intrinsic strength of a 5' ss defined by its ability to basepair with the U1 snRNA and the sequence surrounding, we mutated the 5' splice site to gradually vary its strength (A) and tested it in the context of different numbers of enhancer binding sites in the vicinity. (B) Transfection experiments were carried out as described above and samples were subjected to semi-quantitative and quantitative RT-PCR analysis.

## REVISED: Supplemental Figure 6

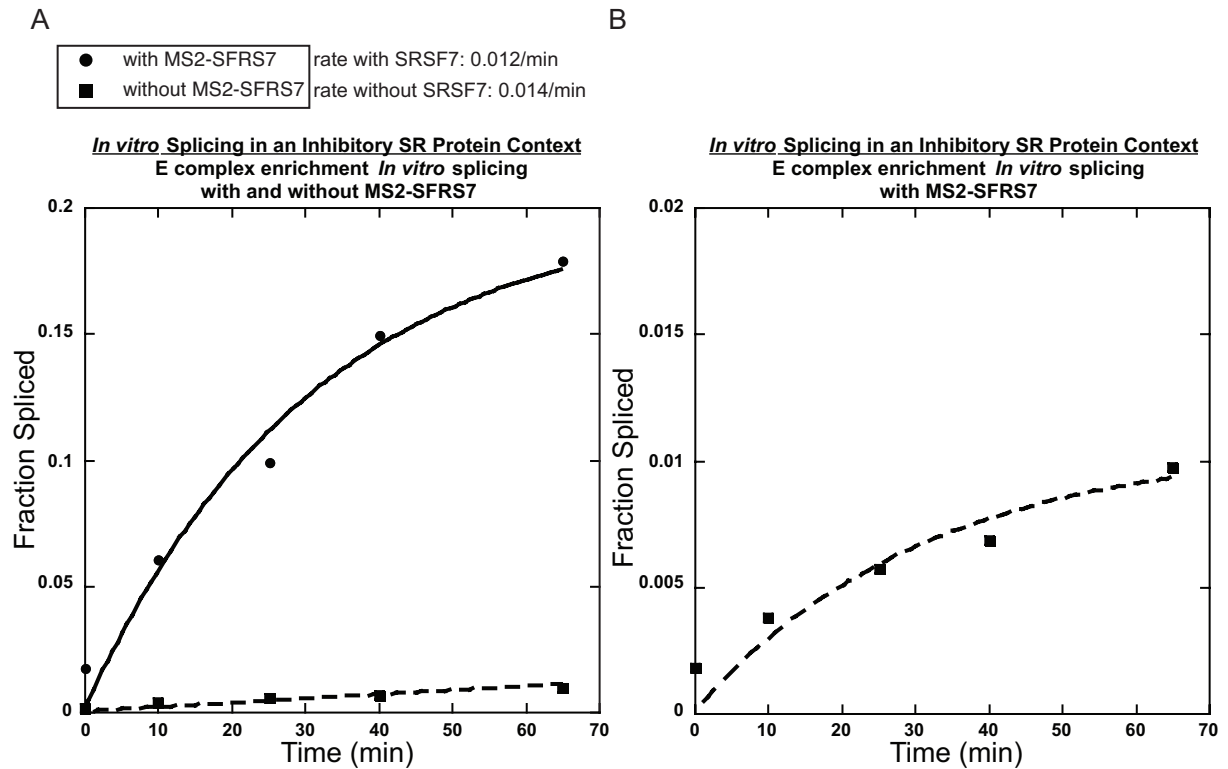

### Supplemental Figure 6: Results from E-complex pulse chase experiments in the presence or absence of MS-SRSF7.

E-complex was enriched in the absence of ATP, and the reaction was then chased as described in the Supplemental Materials and Methods. **(A)** Kinetic profiles for both reactions are shown, demonstrating that the presence of MS2-SRSF7 reduces splicing efficiency. **(B)** Blow-up of the reaction in the presence of MS-SRSF7 demonstrating approach to endpoint kinetics. Thus, the reduced kinetics are not due to a drop in the rate of splicing, but due to the drop in the fraction of enriched E-complexes that progress to active spliceosomes.
